# Supplementary material for: Comparison of SEC and AF4 analytical tools for size estimation of typhoid Vi polysaccharides
Source: Royal Society of Chemistry journal article supplement (doi:10.1039/c9ay00145j), 2019-01-01
Supplement: c9ay00145j1.pdf [file c9ay00145j1.pdf]

Analytical Methods – Electronic Supplementary Information

**Comparison of SEC and AF4 analytical tools for size estimation of typhoid Vi polysaccharides**

Caroline Bayart,<sup>a,b</sup> Elisa Jean,<sup>b</sup> Marie Paillagot<sup>b</sup> Alexia Renoud,<sup>c</sup> Alice Raillard<sup>c</sup> Joseph Paladino<sup>b</sup>  
and Marc Le Borgne<sup>\*a</sup>

<sup>a</sup>*Université de Lyon, Université Lyon 1, Faculté de Pharmacie - ISPB, EA 4446 Bioactive Molecules and Medicinal Chemistry, SFR Santé Lyon-Est CNRS UMS3453 - INSERM US7, 69373 Lyon cedex 8, France. E-mail: marc.le-borgne@univ-lyon1.fr*

<sup>b</sup>*Reaction and Coupling Chemistry Laboratory, MTech, Sanofi Pasteur, 31/33 quai Armand Barbès, 69250 Neuville-sur-Saône, France*

<sup>c</sup>*Modeling and Process Control Strategy, MTech, Sanofi Pasteur, 31/33 quai Armand Barbès, 69250 Neuville-sur-Saône, France.*

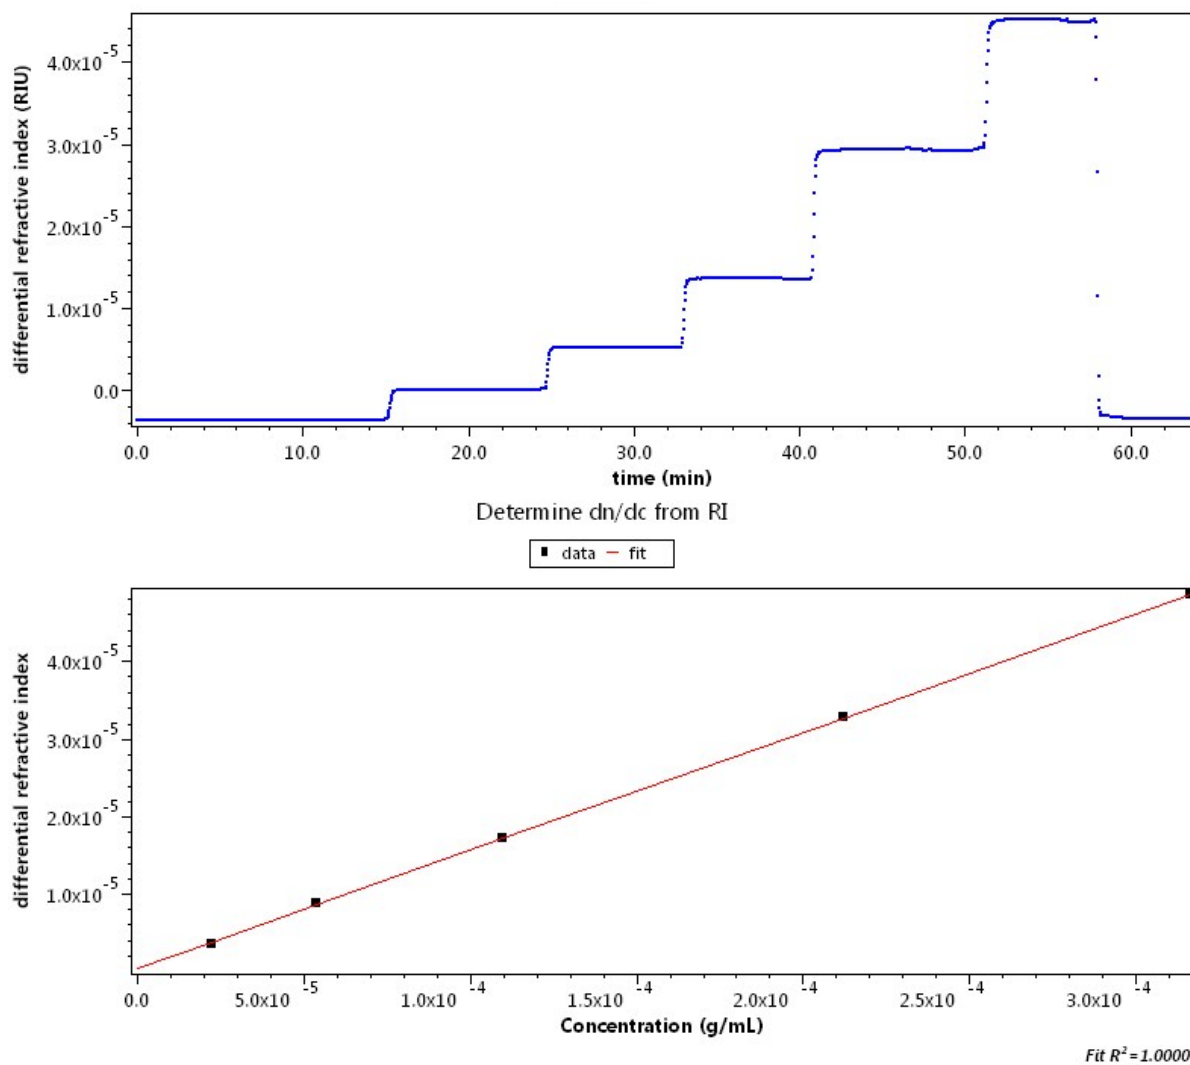

**Fig. S1** Determination of  $dn/dc$  value. On top: dRI increase following injections of PS of increasing concentrations. On bottom: Plot of the dRI values in function of the PS samples concentrations; the slope corresponds to the  $dn/dc$  value.

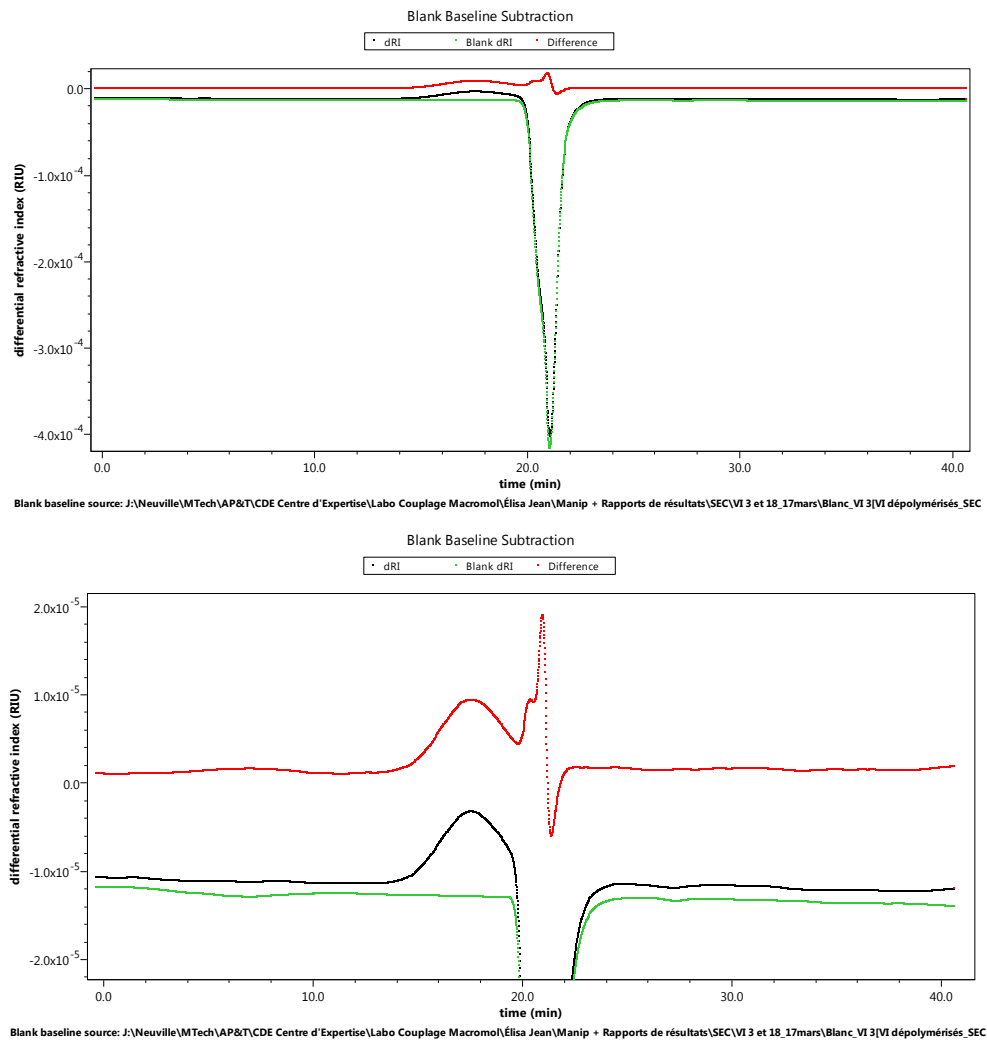

**Fig. S2** Blank baseline subtraction of depolymerized Vi-CPS using SEC. In black, Vi-CPS dRI signal; in green blank dRI signal; in red Vi-CPS dRI signal after the blank baseline subtraction.

**Table S1** Retention times (min) of Vi-CPS and depolymerized Vi analyzed using SEC or AF4 separation.

|                       | Vi-CPS |       | Depolymerized Vi |       |
|-----------------------|--------|-------|------------------|-------|
|                       | SEC    | AF4   | SEC              | AF4   |
| Series 1- injection 1 | 10.97  | 20.12 | 17.60            | 12.19 |
| Series 1- injection 2 | 10.96  | 20.19 | 17.62            | 12.16 |
| Series 1- injection 3 | 10.97  | 20.10 | 17.60            | 12.17 |
| Series 1- injection 4 | 10.95  | 20.10 | 17.61            | 12.17 |
| Series 1- injection 5 | 11.02  | 20.12 | 17.63            | 12.19 |
| Series 2- injection 1 | 10.93  | 19.99 | 17.63            | 12.14 |
| Series 2- injection 2 | 10.95  | 19.96 | 17.62            | 12.16 |
| Series 2- injection 3 | 10.95  | 20.02 | 17.62            | 12.16 |
| Series 2- injection 4 | 10.95  | 19.96 | 17.64            | 12.16 |
| Series 2- injection 5 | 10.95  | 19.96 | 17.63            | 12.16 |
| Series 3- injection 1 | 10.97  | 19.97 | 17.62            | 12.16 |
| Series 3- injection 2 | 11.04  | 19.97 | 17.64            | 12.17 |
| Series 3- injection 3 | 10.95  | 19.97 | 17.63            | 12.16 |
| Series 3- injection 4 | 10.96  | 19.97 | 17.64            | 12.16 |
| Series 3- injection 5 | 10.96  | 19.96 | 17.66            | 12.17 |
| Series 4- injection 1 | 10.94  | 20.05 | 17.63            | 12.17 |
| Series 4- injection 2 | 10.96  | 20.13 | 17.64            | 12.19 |
| Series 4- injection 3 | 10.94  | 20.10 | 17.61            | 12.17 |
| Series 4- injection 4 | 10.95  | 20.08 | 17.61            | 12.17 |
| Series 4- injection 5 | 10.93  | 20.10 | 17.61            | 12.17 |
| Series 5- injection 1 | 11.38  | 20.13 | 17.64            | 12.17 |
| Series 5- injection 2 | 10.89  | 20.19 | 17.64            | 12.17 |
| Series 5- injection 3 | 10.91  | 20.15 | 17.60            | 12.17 |
| Series 5- injection 4 | 11.20  | 20.10 | 17.66            | 12.19 |
| Series 5- injection 5 | 10.88  | 20.16 | 17.66            | 12.17 |
| Mean                  | 10.98  | 20.06 | 17.63            | 12.17 |
| Std                   | 0.10   | 0.08  | 0.02             | 0.01  |
| CV (%)                | 0.94   | 0.40  | 0.10             | 0.10  |
